# Supplementary material for: Missed Opportunities for Sedation and Pain Management at a Level III Neonatal Intensive Care Unit, India
Source: PubMed Central journal article supplement (PMC4763094; doi:10.3389/fped.2016.00007), 2016-02-23
Supplement: Data_Sheet_1.pdf [file Data_Sheet_1.pdf]

## *Supplementary Material*

### **Missed opportunities for sedation and pain management at a level III neonatal intensive care unit, India**

**Shikha Y. Kothari, Ashish R Dongara, Somashekhar M. Nimbalkar\*, Ajay G. Phatak, and Archana S. Nimbalkar**

\* **Correspondence:** Somashekhar M. Nimbalkar: [somu\\_somu@yahoo.com](mailto:somu_somu@yahoo.com)

#### **1 Supplementary Tables**

**Supplementary Table 1. Procedure classification and documentation.**

|                                   | 29 Observed Neonates |                       | 40 File Audits        |                            |
|-----------------------------------|----------------------|-----------------------|-----------------------|----------------------------|
|                                   | Procedures Observed  | Procedures Documented | Procedures Documented | Pharmaceutical Pain Relief |
| <b>Stressful/Disturbing</b>       |                      |                       |                       |                            |
| Eliciting Activity                | 3                    | 0                     | 3                     | 3                          |
| Gastric Lavage                    | 1                    | 1                     | 4                     | 2                          |
| Echocardiography                  | 2                    | 1                     | 6                     | 1                          |
| Remove Ink Footprint              | 2                    | 1                     | 6                     | 1                          |
| Nasogastric Tube Aspiration       | 1                    | 1                     | 7                     | 2                          |
| Nebulizer                         | 9                    | 9                     | 8                     | 0                          |
| Standing X Ray                    | 1                    | 1                     | 15                    | 3                          |
| Ultrasonography                   | 2                    | 2                     | 15                    | 4                          |
| Blood Transfusion                 | 3                    | 3                     | 21                    | 8                          |
| Bedside Chest X Ray               | 7                    | 7                     | 32                    | 15                         |
| Weight                            | 68                   | 68                    | 283                   | 34                         |
| Non Invasive Blood Pressure       | 173                  | 164                   | 626                   | 223                        |
| Physical Exam                     | 278                  | 278                   | 1340                  | 245                        |
| Diaper Change                     | 280                  | 280                   | 1795                  | 254                        |
| Abdominal Girth                   | 280                  | 280                   | 1888                  | 267                        |
| Temperature                       | 283                  | 283                   | 1925                  | 273                        |
| Position Change                   | 311                  | 311                   | 2190                  | 316                        |
| Surfactant Administration         | 1                    | 1                     | 6                     | 1                          |
| <b>Total Stressful Procedures</b> | <b>1705</b>          | <b>1691</b>           | <b>10170</b>          | <b>1652</b>                |

|                                     |      |      |       |      |
|-------------------------------------|------|------|-------|------|
| <b>Mildly Painful</b>               |      |      |       |      |
| Intramuscular Injection             | 1    | 1    | 2     | 0    |
| Nasogastric Tube Adjust             | 2    | 0    | 2     | 0    |
| Nasogastric Tube Removal            | 7    | 1    | 2     | 1    |
| IV Adjust                           | 1    | 0    | 3     | 0    |
| Nasogastric Tube Insertion          | 14   | 0    | 5     | 2    |
| Change IV                           | 1    | 1    | 14    | 6    |
| IV Removal                          | 6    | 6    | 19    | 7    |
| Remove Umbilical Line               | 3    | 2    | 19    | 6    |
| Umbilical Catheterization           | 7    | 7    | 25    | 10   |
| Venepuncture                        | 27   | 27   | 62    | 16   |
| Eye Drops                           | 2    | 2    | 62    | 4    |
| Blood Sample                        | 18   | 18   | 143   | 42   |
| Heel Prick                          | 130  | 130  | 627   | 131  |
| Total Mildly Painful Procedures     | 219  | 195  | 985   | 225  |
| <b>Moderately Painful</b>           |      |      |       |      |
| Change Endotracheal Tube            | 1    | 1    | 4     | 3    |
| Endotracheal Tube Adjust            | 3    | 0    | 5     | 2    |
| Lumbar Puncture                     | 5    | 5    | 10    | 6    |
| Remove Endotracheal Tube            | 2    | 1    | 19    | 6    |
| Change Umbilical Dressing           | 4    | 4    | 23    | 17   |
| Endotracheal Tube Insertion         | 2    | 1    | 30    | 11   |
| Remove Umbilical Dressing           | 2    | 2    | 37    | 21   |
| Suction                             | 178  | 175  | 351   | 94   |
| Per Rectal Exam                     | 0    | 0    | 1     | 0    |
| Urinary Catheterization             | 0    | 0    | 1     | 0    |
| Total Moderately Painful Procedures | 197  | 189  | 481   | 160  |
| Total Procedures                    | 2121 | 2075 | 11636 | 2037 |

**Supplementary Table 2. Procedure classification and distribution over first seven days of admission.**Data representing the 40 retrospective neonatal file audits from the second study phase.

| Name Of Procedure                             | Day1 | Day2 | Day3 | Day4 | Day5 | Day6 | Day7 | Total |
|-----------------------------------------------|------|------|------|------|------|------|------|-------|
| <b>Stressful/Disturbing</b>                   |      |      |      |      |      |      |      |       |
| Physical Exam Frequency                       | 257  | 186  | 211  | 188  | 178  | 171  | 149  | 1340  |
| Physical Exam Pain Relief Noted               | 62   | 37   | 53   | 37   | 46   | 3    | 7    | 245   |
| Position Change Frequency                     | 194  | 340  | 345  | 340  | 329  | 331  | 311  | 2190  |
| Position Change Pain Relief Noted             | 43   | 57   | 75   | 74   | 47   | 8    | 12   | 316   |
| Non Invasive Blood Pressure Frequency         | 79   | 135  | 107  | 89   | 71   | 75   | 70   | 626   |
| Non Invasive Blood Pressure Pain Relief Noted | 33   | 43   | 57   | 41   | 33   | 8    | 8    | 223   |
| Temperature Frequency                         | 153  | 290  | 292  | 304  | 303  | 307  | 276  | 1925  |
| Temperature Pain Relief Noted                 | 36   | 52   | 65   | 57   | 45   | 8    | 10   | 273   |
| Abdominal Girth Frequency                     | 144  | 281  | 288  | 300  | 292  | 300  | 283  | 1888  |
| Abdominal Girth Pain Relief Noted             | 36   | 51   | 62   | 60   | 40   | 8    | 10   | 267   |
| Diaper Change Frequency                       | 110  | 267  | 294  | 298  | 283  | 291  | 252  | 1795  |
| Diaper Change Pain Relief Noted               | 20   | 43   | 67   | 62   | 44   | 8    | 10   | 254   |
| Weight Frequency                              | 42   | 41   | 40   | 40   | 40   | 40   | 40   | 283   |
| Weight Pain Relief Noted                      | 7    | 7    | 7    | 7    | 5    | 0    | 1    | 34    |
| Nasogastric Tube Aspiration Frequency         | 1    | 1    | 1    | 0    | 0    | 1    | 3    | 7     |
| Nasogastric Tube Aspiration Pain Relief Noted | 1    | 1    | 0    | 0    | 0    | 0    | 0    | 2     |
| Bedside Chest X-Ray Frequency                 | 10   | 8    | 1    | 7    | 2    | 2    | 2    | 32    |
| Bedside Chest X-Ray Pain Relief Noted         | 5    | 3    | 1    | 4    | 1    | 1    | 0    | 15    |
| Standing X-Ray Frequency                      | 5    | 2    | 0    | 4    | 1    | 1    | 2    | 15    |
| Standing X-Ray Pain Relief Noted              | 1    | 0    | 0    | 2    | 0    | 0    | 0    | 3     |
| Echocardiography Frequency                    | 1    | 2    | 1    | 0    | 2    | 0    | 0    | 6     |
| Echocardiography Pain Relief Noted            | 1    | 0    | 0    | 0    | 0    | 0    | 0    | 1     |
| Ultrasonography Frequency                     | 1    | 5    | 4    | 2    | 2    | 1    | 0    | 15    |
| Ultrasonography Pain Relief Noted             | 0    | 2    | 1    | 1    | 0    | 0    | 0    | 4     |
| Remove Ink Footprint Frequency                | 6    | 0    | 0    | 0    | 0    | 0    | 0    | 6     |
| Remove Ink Footprint Pain Relief Noted        | 1    | 0    | 0    | 0    | 0    | 0    | 0    | 1     |
| Blood Transfusion Frequency                   | 8    | 1    | 0    | 6    | 4    | 1    | 1    | 21    |
| Blood Transfusion Pain Relief Noted           | 4    | 1    | 0    | 3    | 0    | 0    | 0    | 8     |
| Gastric Lavage Frequency                      | 1    | 2    | 0    | 0    | 0    | 1    | 0    | 4     |
| Gastric Lavage Pain Relief Noted              | 0    | 2    | 0    | 0    | 0    | 0    | 0    | 2     |
| Eliciting Activity Frequency                  | 3    | 0    | 0    | 0    | 0    | 0    | 0    | 3     |
| Eliciting Activity Pain Relief Noted          | 3    | 0    | 0    | 0    | 0    | 0    | 0    | 3     |

## Supplementary Material

|                                                                        |      |      |      |      |      |      |      |       |
|------------------------------------------------------------------------|------|------|------|------|------|------|------|-------|
| Nebulizer Frequency                                                    | 3    | 0    | 0    | 0    | 1    | 0    | 4    | 8     |
| Nebulizer Pain Relief Noted                                            | 0    | 0    | 0    | 0    | 0    | 0    | 0    | 0     |
| Surfactant Administration Frequency                                    | 2    | 4    | 0    | 0    | 0    | 0    | 0    | 6     |
| Surfactant Administration Pain Relief Noted                            | 1    | 0    | 0    | 0    | 0    | 0    | 0    | 1     |
| <b>Total Frequency Stressful Procedures</b>                            | 1020 | 1565 | 1584 | 1578 | 1508 | 1522 | 1393 | 10170 |
| <b>Total Frequency Pain Relief Noted For Stressful Procedures</b>      | 254  | 299  | 388  | 348  | 261  | 44   | 58   | 1652  |
| <b>Mildly Painful</b>                                                  |      |      |      |      |      |      |      |       |
| Heel Prick Frequency                                                   | 115  | 111  | 94   | 89   | 79   | 71   | 68   | 627   |
| Heel Prick Pain Relief Noted                                           | 24   | 30   | 29   | 25   | 18   | 2    | 3    | 131   |
| Venepuncture Frequency                                                 | 18   | 13   | 7    | 9    | 8    | 3    | 4    | 62    |
| Venepuncture Pain Relief Noted                                         | 4    | 4    | 4    | 2    | 2    | 0    | 0    | 16    |
| Change IV Frequency                                                    | 0    | 4    | 3    | 3    | 2    | 2    | 0    | 14    |
| Change IV Pain Relief Noted                                            | 0    | 2    | 2    | 2    | 0    | 0    | 0    | 6     |
| IV Removal Frequency                                                   | 0    | 5    | 3    | 5    | 2    | 3    | 1    | 19    |
| IV Removal Pain Relief Noted                                           | 0    | 3    | 2    | 2    | 0    | 0    | 0    | 7     |
| Blood Sample Frequency                                                 | 35   | 25   | 27   | 22   | 15   | 10   | 9    | 143   |
| Blood Sample Pain Relief Noted                                         | 12   | 8    | 12   | 8    | 2    | 0    | 0    | 42    |
| Umbilical Catheterization Frequency                                    | 18   | 3    | 1    | 3    | 0    | 0    | 0    | 25    |
| Umbilical Catheterization Pain Relief Noted                            | 8    | 1    | 0    | 1    | 0    | 0    | 0    | 10    |
| Nasogastric Tube Insertion Frequency                                   | 1    | 1    | 2    | 0    | 0    | 1    | 0    | 5     |
| Nasogastric Tube Insertion Pain Relief Noted                           | 0    | 0    | 2    | 0    | 0    | 0    | 0    | 2     |
| Intramuscular Injection Frequency                                      | 2    | 0    | 0    | 0    | 0    | 0    | 0    | 2     |
| Intramuscular Injection Pain Relief Noted                              | 0    | 0    | 0    | 0    | 0    | 0    | 0    | 0     |
| IV Adjust Frequency                                                    | 0    | 0    | 0    | 0    | 3    | 0    | 0    | 3     |
| IV Adjust Pain Relief Noted                                            | 0    | 0    | 0    | 0    | 0    | 0    | 0    | 0     |
| Remove Umbilical Line Frequency                                        | 2    | 2    | 3    | 4    | 4    | 2    | 2    | 19    |
| Remove Umbilical Line Pain Relief Noted                                | 2    | 1    | 0    | 1    | 2    | 0    | 0    | 6     |
| Nasogastric Tube Adjust Frequency                                      | 1    | 1    | 0    | 0    | 0    | 0    | 0    | 2     |
| Nasogastric Tube Adjust Pain Relief Noted                              | 0    | 0    | 0    | 0    | 0    | 0    | 0    | 0     |
| Nasogastric Tube Removal Frequency                                     | 0    | 0    | 1    | 0    | 0    | 1    | 0    | 2     |
| Nasogastric Tube Removal Pain Relief Noted                             | 0    | 0    | 1    | 0    | 0    | 0    | 0    | 1     |
| Eye Drops Frequency                                                    | 4    | 5    | 8    | 14   | 13   | 8    | 10   | 62    |
| Eye Drops Pain Relief Noted                                            | 0    | 0    | 0    | 4    | 0    | 0    | 0    | 4     |
| <b>Total Frequency Mildly Painful Procedures</b>                       | 196  | 170  | 149  | 149  | 126  | 101  | 94   | 985   |
| <b>Total Frequency Pain Relief Noted For Mildly Painful Procedures</b> | 50   | 49   | 52   | 45   | 24   | 2    | 3    | 225   |

|                                                                                   |      |      |      |      |      |      |      |       |
|-----------------------------------------------------------------------------------|------|------|------|------|------|------|------|-------|
| <b>Moderately Painful</b>                                                         |      |      |      |      |      |      |      |       |
| Suction Frequency                                                                 | 70   | 63   | 52   | 47   | 42   | 41   | 36   | 351   |
| Suction Pain Relief Noted                                                         | 19   | 13   | 25   | 19   | 13   | 3    | 2    | 94    |
| Endotracheal Tube Insertion Frequency                                             | 20   | 3    | 0    | 3    | 0    | 3    | 1    | 30    |
| Endotracheal Tube Insertion Pain Relief Noted                                     | 6    | 3    | 0    | 1    | 0    | 1    | 0    | 11    |
| Change Endotracheal Tube Frequency                                                | 2    | 1    | 0    | 0    | 0    | 1    | 0    | 4     |
| Change Endotracheal Tube Pain Relief Noted                                        | 1    | 1    | 0    | 0    | 0    | 1    | 0    | 3     |
| Lumbar Puncture Frequency                                                         | 1    | 2    | 2    | 5    | 0    | 0    | 0    | 10    |
| Lumbar Puncture Pain Relief Noted                                                 | 1    | 1    | 1    | 3    | 0    | 0    | 0    | 6     |
| Remove Umbilical Dressing Frequency                                               | 7    | 6    | 5    | 6    | 5    | 6    | 2    | 37    |
| Remove Umbilical Dressing Pain Relief Noted                                       | 7    | 5    | 2    | 2    | 2    | 3    | 0    | 21    |
| Change Umbilical Dressing Frequency                                               | 5    | 4    | 3    | 4    | 3    | 4    | 0    | 23    |
| Change Umbilical Dressing Pain Relief Noted                                       | 5    | 3    | 2    | 2    | 2    | 3    | 0    | 17    |
| Endotracheal Tube Adjust Frequency                                                | 2    | 1    | 0    | 1    | 0    | 1    | 0    | 5     |
| Endotracheal Tube Adjust Pain Relief Noted                                        | 0    | 1    | 0    | 0    | 0    | 1    | 0    | 2     |
| Remove Endotracheal Tube Frequency                                                | 7    | 3    | 2    | 3    | 0    | 4    | 0    | 19    |
| Remove Endotracheal Tube Pain Relief Noted                                        | 2    | 1    | 0    | 2    | 0    | 1    | 0    | 6     |
| Per Rectal Exam Frequency                                                         | 0    | 0    | 0    | 0    | 0    | 1    | 0    | 1     |
| Per Rectal Exam Pain Relief Noted                                                 | 0    | 0    | 0    | 0    | 0    | 0    | 0    | 0     |
| Urethral Catheterization Frequency                                                | 0    | 0    | 0    | 0    | 0    | 0    | 1    | 1     |
| Urethral Catheterization Pain Relief Noted                                        | 0    | 0    | 0    | 0    | 0    | 0    | 0    | 0     |
| <b>Total Frequency Moderately Painful Procedures</b>                              | 114  | 83   | 64   | 69   | 50   | 61   | 40   | 481   |
| <b>Total Frequency Pain Relief Noted For Moderately Painful Procedures</b>        | 41   | 28   | 30   | 29   | 17   | 13   | 2    | 160   |
| <b>Total Frequency All Painful Procedures</b>                                     | 310  | 253  | 213  | 218  | 176  | 162  | 134  | 1466  |
| <b>Total Frequency Pain Relief Noted For All Painful Procedures</b>               | 91   | 77   | 82   | 74   | 41   | 15   | 5    | 385   |
| <b>Total Frequency All Painful And Stressful Procedures</b>                       | 1330 | 1818 | 1797 | 1796 | 1684 | 1684 | 1527 | 11636 |
| <b>Total Frequency Pain Relief Noted For All Painful And Stressful Procedures</b> | 345  | 376  | 470  | 422  | 302  | 59   | 63   | 2037  |

**Supplementary Table 3. Associated conditions neonates developed/presented with at the time of admission.** “Pain relief” neonates are those receiving pharmaceutical agents for at least one procedure. “Non pain relief” neonates have not received any pharmaceutical pain relief/central nervous system depressing agents.

| Associated Conditions                                | 29 Observed Neonates |                 |       | 40 File Audits |                 |       | All 69 Neonates |                 |       |
|------------------------------------------------------|----------------------|-----------------|-------|----------------|-----------------|-------|-----------------|-----------------|-------|
|                                                      | Pain Relief          | Non Pain Relief | Total | Pain Relief    | Non Pain Relief | Total | Pain Relief     | Non Pain Relief | Total |
| <b>Birth Asphyxia</b>                                | 3                    | 0               | 3     | 6              | 2               | 8     | 9               | 2               | 11    |
| <b>Early Onset Sepsis</b>                            | 8                    | 13              | 21    | 7              | 14              | 21    | 15              | 27              | 42    |
| <b>Late Onset Sepsis</b>                             | 0                    | 0               | 0     | 2              | 1               | 3     | 2               | 1               | 3     |
| <b>Hypoxic Ischemic Encephalopathy</b>               | 3                    | 0               | 3     | 4              | 1               | 5     | 7               | 1               | 8     |
| <b>Apnea of Prematurity</b>                          | 2                    | 3               | 5     | 1              | 0               | 1     | 3               | 3               | 6     |
| <b>Microcephaly</b>                                  | 0                    | 1               | 1     | 0              | 1               | 1     | 0               | 2               | 2     |
| <b>Perinatal Depression</b>                          | 0                    | 0               | 0     | 0              | 3               | 3     | 0               | 3               | 3     |
| <b>On Ventilatory Support</b>                        | 8                    | 6               | 14    | 7              | 4               | 11    | 15              | 10              | 25    |
| <b>On Continuous Positive Airway Pressure (CPAP)</b> | 5                    | 5               | 10    | 3              | 6               | 9     | 8               | 11              | 19    |
| <b>Congenital Heart Disease</b>                      | 1                    | 1               | 2     | 4              | 0               | 4     | 5               | 1               | 6     |
| <b>Meconium Stained Liquor</b>                       | 2                    | 2               | 4     | 5              | 6               | 11    | 7               | 8               | 15    |
| <b>Meconium Aspiration Syndrome</b>                  | 1                    | 0               | 1     | 2              | 2               | 4     | 3               | 2               | 5     |
| <b>Respiratory Distress Syndrome</b>                 | 5                    | 7               | 12    | 6              | 8               | 14    | 11              | 15              | 26    |
| <b>Electrolyte Imbalance</b>                         | 1                    | 0               | 1     | 2              | 0               | 2     | 3               | 0               | 3     |
| <b>Hyperbilirubinemia</b>                            | 4                    | 3               | 7     | 0              | 1               | 1     | 4               | 4               | 8     |
| <b>Pulmonary Hypertension</b>                        | 0                    | 0               | 0     | 1              | 0               | 1     | 1               | 0               | 1     |
| <b>Pneumonia</b>                                     | 0                    | 1               | 1     | 0              | 1               | 1     | 0               | 2               | 2     |
| <b>Septicemic Shock</b>                              | 0                    | 0               | 0     | 1              | 0               | 1     | 1               | 0               | 1     |
| <b>Septicemia with Septic Shock</b>                  | 0                    | 0               | 0     | 0              | 1               | 1     | 0               | 1               | 1     |

|                                               |   |   |   |   |   |   |   |   |   |
|-----------------------------------------------|---|---|---|---|---|---|---|---|---|
| <b>Septic Shock with Multi Organ Damage</b>   | 0 | 0 | 0 | 1 | 0 | 1 | 1 | 0 | 1 |
| <b>Cardiogenic Shock</b>                      | 0 | 0 | 0 | 1 | 0 | 1 | 1 | 0 | 1 |
| <b>Acute Kidney Injury</b>                    | 0 | 0 | 0 | 1 | 0 | 1 | 1 | 0 | 1 |
| <b>Chronic Lung Disease</b>                   | 0 | 0 | 0 | 1 | 0 | 1 | 1 | 0 | 1 |
| <b>Deranged Coag Profile</b>                  | 0 | 0 | 0 | 1 | 0 | 1 | 1 | 0 | 1 |
| <b>Disseminated Intravascular Coagulation</b> | 0 | 0 | 0 | 1 | 0 | 1 | 1 | 0 | 1 |
| <b>Transient Tachypnea of Newborn</b>         | 0 | 0 | 0 | 0 | 1 | 1 | 0 | 1 | 1 |
| <b>Exchange Transfusion Required</b>          | 0 | 0 | 0 | 1 | 1 | 2 | 1 | 1 | 2 |
| <b>Surfactant Required</b>                    | 2 | 0 | 2 | 1 | 1 | 2 | 3 | 1 | 4 |
| <b>Anemia of Prematurity</b>                  | 0 | 2 | 2 | 0 | 0 | 0 | 0 | 2 | 2 |
| <b>Hypoglycemia</b>                           | 2 | 1 | 3 | 0 | 0 | 0 | 2 | 1 | 3 |
| <b>Pneumothorax</b>                           | 1 | 2 | 3 | 0 | 0 | 0 | 1 | 2 | 3 |
| <b>Meningitis</b>                             | 2 | 0 | 2 | 0 | 0 | 0 | 2 | 0 | 2 |
